# Supplementary material for: Global phylogenetic analysis of contemporary aleutian mink disease viruses (AMDVs)
Source: Virol J. 2017 Nov 22;14:231. doi: 10.1186/s12985-017-0898-y (PMC5700682; doi:10.1186/s12985-017-0898-y)
Supplement: Additional file 1: — Global pholygentic tree of AMDVs. (PDF 1920 kb) [file 12985_2017_898_MOESM1_ESM.pdf]

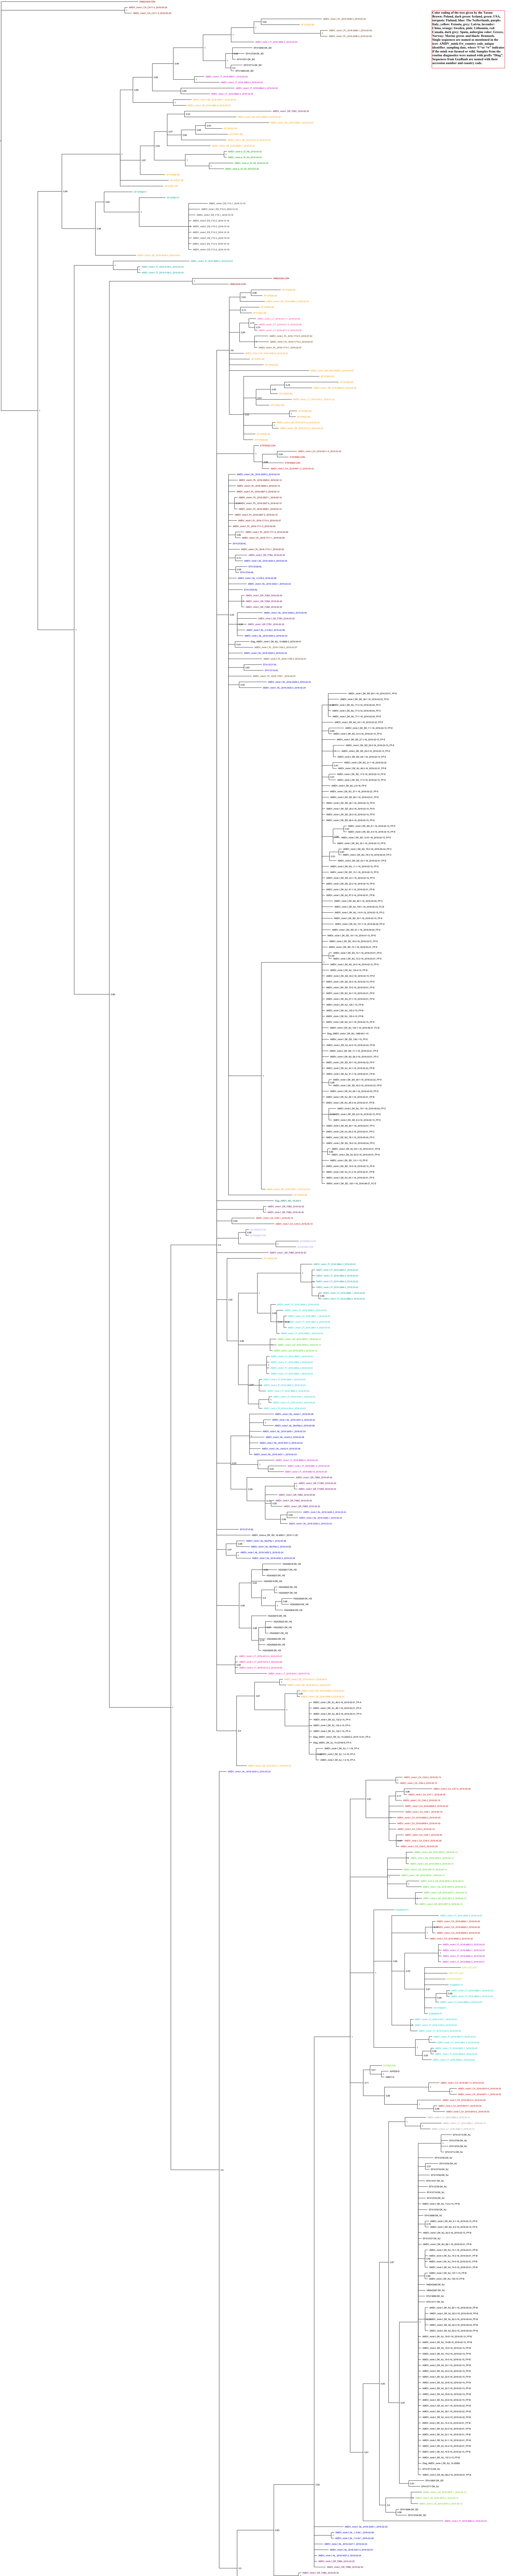

Color coding of the tree given by the Taxon:  
Brown: Poland, dark green: Kendal, green: USA,  
Turquoise: Finland, Silver: The Netherlands, purple:  
Italy, yellow: Slovenia, grey: Latvia, lavender:  
Croatia, orange: Sweden, dark blue: Lithuania, red:  
Canada, dark grey: Spain, subscript color: Greece,  
Green: New Zealand, black: Bulgaria.  
Single sequences are named as mentioned in the  
text. AMDV: virus, country code, unique  
identifier, sampling date, where "F" or "P" indicates  
if the virus was found in a host. Samples from the  
same time periods were named with prefix "Bing".  
The sequences from the Netherlands were named with their  
accession number and country code.
